1        **Investigating antibody reactivity to the intestinal microbiome in severe**  
2                    **myalgic encephalomyelitis/chronic fatigue syndrome (ME/CFS)**

3

4    Katharine A. Seton<sup>1</sup>, Marianne Defernez<sup>1</sup>, Andrea Telatin<sup>1</sup>, Sumeet K. Tiwari<sup>1</sup>,  
5    George M. Savva<sup>1</sup>, Antonietta Hayhoe<sup>1</sup>, Alistair Noble<sup>3</sup>, Ana Carvalho<sup>4</sup>, Steve  
6    James<sup>1</sup>, Amolak Bansal<sup>5</sup>, Thomas Wileman<sup>1,2</sup> and Simon R. Carding<sup>1,2</sup>

7

8    <sup>1</sup>*Quadram Institute Bioscience, Norwich Research Park, Norwich, NR4 7UQ, UK*

9    <sup>2</sup>*Norwich Medical School, University of East Anglia, Norwich, NR4 7TJ, UK*

10   <sup>3</sup>*The Pirbright Institute, Woking, GU24 0NF, UK*

11   <sup>4</sup>*Experimental Arthritis Treatment Centre for Children, University of Liverpool, Liverpool,*  
12   *L12 2AP*

13   <sup>5</sup>*Spire St Anthony's Hospital, Surrey, SM3 9DW, UK*

14

15

16    Corresponding author:

17    Prof. Simon R. Carding

18    Food, Microbiome and Health Research Programme

19    Quadram Institute Bioscience

20    Norwich Research Park

21    Norwich, NR4 7UQ

22    U.K.

23    (e) [simon.carding@quadram.ac.uk](mailto:simon.carding@quadram.ac.uk)

24 **Abstract**

25 Myalgic encephalomyelitis/chronic fatigue syndrome (ME/CFS) is a multisystemic disease of  
26 unknown aetiology that is characterised by disabling chronic fatigue and involves both the  
27 immune and gastrointestinal (GI) systems. Patients display alterations in GI microbiome with  
28 a significant proportion experiencing GI discomfort and pain and elevated blood biomarkers  
29 for altered intestinal permeability compared with healthy individuals. To investigate a  
30 possible GI origin of ME/CFS we designed a feasibility study to test the hypothesis that  
31 ME/CFS pathogenesis is a consequence of increased intestinal permeability that results in  
32 microbial translocation and a breakdown in immune tolerance leading to generation of  
33 antibodies reactive to indigenous intestinal microbes. Secretory IgA and serum IgG levels  
34 and reactivity to intestinal microbes were assessed in five pairs of severe ME/CFS patients  
35 and matched same-household healthy controls. For profiling serum IgG we developed IgG-  
36 Seq which combines flow-cytometry based bacterial cell sorting and metagenomics to detect  
37 mucosal IgG reactivity to the microbiome. We uncovered evidence for immune dysfunction  
38 in severe ME/CFS patients that was characterised by reduced capacity and reactivity of serum  
39 IgG to stool microbes, irrespective of their source. This study provides the rationale for  
40 additional studies in larger cohorts of ME/CFS patients to further explore immune-  
41 microbiome interactions.

42

43 **Keywords:** Myalgic Encephalomyelitis/Chronic Fatigue Syndrome (ME/CFS), antibodies,  
44 immunoglobulin G, immunoglobulin A, microbiome, autologous, heterologous, immune tolerance,  
45 leaky gut.

46 **Introduction:**

47 Myalgic encephalomyelitis/chronic fatigue syndrome (ME/CFS) is characterised by disabling  
48 fatigue and autonomic, muscular, cognitive, neurological and immune symptoms that leave  
49 patients unable to undertake their pre-morbid work, education, exercise and social activities<sup>1</sup>.  
50 A quarter of diagnosed patients are house- or bedbound<sup>2</sup> and less than 5% ever recover their  
51 pre-morbid activity levels<sup>3</sup>. A meta-analysis based on 45 studies estimated an average  
52 population prevalence of 0.68% (95%CI = 0.48 to 0.97)<sup>4</sup>. However, these estimates vary  
53 considerably by population and case definition<sup>4</sup>. The prevalence is anticipated to rise  
54 following the COVID-19 pandemic as 45.2% of long COVID patients fulfil ME/CFS  
55 diagnostic criteria<sup>5</sup>. The most common trigger of ME/CFS is an infection, while other  
56 reported triggers include physical or mental trauma and toxin exposure<sup>3</sup>.

57 Several factors have been implicated in ME/CFS pathogenesis involving the immune  
58 (autoimmunity, inflammation and chronic infection), gastrointestinal (GI), neurological,  
59 endocrine and metabolic systems<sup>6</sup>. Between 38 and 92% of ME/CFS patients report co-  
60 morbid GI disturbances such as IBS<sup>3,7-9</sup> and 35% of patients take medication for GI  
61 disturbances including pro- and prebiotics, digestive enzymes and sodium bicarbonate<sup>3</sup>. The  
62 high co-occurrence of ME/CFS and IBS suggests possible involvement of the intestinal  
63 microbiome. Consistent with this possibility several studies have reported changes in the  
64 community structure of the stool microbiome of ME/CFS patients exemplified by reduced  
65 diversity<sup>8</sup> and decreased abundance of short-chain fatty acid producing bacterial species<sup>8-12</sup>.  
66 ME/CFS patients may also have elevated biomarkers associated with increased intestinal  
67 permeability<sup>8,13,14</sup>. Intestinal inflammation and increased permeability can compromise  
68 immune and microbial tolerance (defined as a state of hypo responsiveness to autologous  
69 intestinal microbes)<sup>15</sup> leading to hyperreactivity and serum antibody production to  
70 autologous intestinal microbes<sup>16</sup>; this can pre-stage autoimmune disease<sup>17</sup>. Of note, ME/CFS

71 patients displaying increased intestinal permeability have a higher incidence of serotonin  
72 autoimmunity<sup>18</sup>.

73         Based upon these observations we hypothesised that ME/CFS pathology is a  
74 consequence of the breakdown in immune tolerance resulting from the increased intestinal  
75 permeability and microbial translocation that leads to generation of antibodies reactive to  
76 autologous intestinal microbes. In support of this proposal, a previous study found that,  
77 compared with healthy controls, ME/CFS patients had abnormally high levels of IgA and  
78 IgM produced in response to a panel of seven gram-negative enterobacteria<sup>13</sup>. However, this  
79 small panel of microbes does not reflect the complexity of the intestinal microbiota which  
80 comprises 300-500 bacterial species as well as viruses, archaea and fungi<sup>19</sup>. In addition, IgM  
81 antibodies have low specificity for antigens<sup>20</sup> and IgA is primarily produced at mucosal  
82 sites<sup>21</sup>. Serum IgG reactivity to the microbiome in ME/CFS patients has recently been  
83 investigated using phage immunoprecipitation sequencing (PhIP-Seq) to screen IgG  
84 reactivity to 244,000 bacterial and viral epitopes<sup>22</sup>. This study is, however, restricted to  
85 identifying antibody reactivity to peptide antigens and cannot detect reactivity to the  
86 immunogenic glycoproteins and lipoproteins that decorate the outer membrane and surface of  
87 bacterial cells, viruses and fungi<sup>23</sup>. Furthermore, none of the approaches used to date provide  
88 information on whether immune tolerance to indigenous intestinal microbes is lost in  
89 ME/CFS.

90         To begin to address this important question and assess the systemic humoral immune  
91 response to indigenous microbes we adapted ‘IgA-Seq’, a method that combines flow-  
92 cytometry-based bacterial cell sorting and 16S rRNA sequencing to detect mucosal IgA  
93 reactivity to the microbiome<sup>24</sup>, to characterise serum IgG reactivity to the microbiome; we  
94 refer to this new method as IgG-Seq. To evaluate the IgG-Seq protocol, we designed a  
95 feasibility study with a small cohort of severe ME/CFS patients and healthy controls from the

96 same households. The difficulty in accessing housebound or bedbound patients is a major  
97 obstacle to understanding the pathophysiology and aetiology of ME/CFS and is why only  
98 0.5% of ME/CFS research is undertaken in severely affected patients<sup>2</sup>. One aim of this study,  
99 therefore, was to assess the feasibility of, and barriers to, including severe ME/CFS patients  
100 in research involving the collection of biological samples.

101

## 102 **Results:**

### 103 *Recruiting severe ME/CFS patients and same household controls*

104 Study participants were recruited from the CFS clinic at Epsom and St Helier University  
105 Hospitals (ESTH), Carshalton, UK and the ME/CFS service at East Coast Community  
106 Healthcare Centre, Lowestoft, UK which together had 3,812 registered patients. Recruitment  
107 began in October 2017, with the intention of recruiting ten severe house- or bedbound  
108 ME/CFS patients and ceased in April 2020 due to the COVID-19 pandemic. Thirty-six  
109 patients were invited to the study with a response rate of 58.3% (Supplementary Fig. S1). Of  
110 those who responded, 42.9% were ineligible due to either the absence of a household control  
111 (n = 4), failure to meet other inclusion criteria (n = 4) or were unable to provide written  
112 informed consent (n = 1). Of the 12 eligible pairs of participants, six provided informed  
113 consent. The consenting appointments for the other six eligible participants were delayed  
114 either due to patients rescheduling their appointments when feeling unwell, or the non-  
115 availability of phlebotomists to attend home visits. Consequently, consenting appointments  
116 were delayed by up to 12 months for participants, by which point three patients either saw  
117 their health further deteriorate preventing them from participating in the study, or acquired an  
118 additional health complication that excluded them from the study. We received no further  
119 communication from the remaining three pairs.

120 ***Study population characteristics***

121 Samples were collected from five pairs of participants; one pair consented immediately prior  
122 to the COVID-19 pandemic which prevented us from obtaining their samples (Table 1). The  
123 recruited patients comprised four females and one male (mean age 33.8 years; standard  
124 deviation (SD) 13.8). There was clinical heterogeneity amongst patients, with variation in the  
125 age at which ME/CFS onset occurred, length of illness and symptom severity. Three patients  
126 reported ME/CFS onset following a viral infection, one following vaccination and one  
127 following surgery. IBS was reported in all patients but in none of their matched household  
128 controls. Same household healthy controls included four males and one female (mean age  
129 40.4 years; SD 16.7) who were the carers and spouse (n = 3), parent (n = 1) or sibling (n = 1)  
130 of the patients.

131 ***Stool consistency does not separate severe ME/CFS patients with IBS from matched***  
132 ***household controls without IBS***

133 Despite all ME/CFS patients, and no household controls, reporting IBS there was no evidence  
134 for a difference in consistency of the collected stool samples between patients and controls,  
135 as measured by the Bristol stool form scale (BSFS) or by water content (Fig. 1A and 1B).  
136 Three controls had abnormally loose stools (BSFS 5-7) indicative of diarrhoea and one  
137 control had an abnormally hard stool (BSFS 2) indicative of constipation. In contrast, two  
138 patients had stool samples defined as having a healthy consistency (BSFS 3-4), one patient  
139 had an abnormally loose stool (BSFS 5) and two patients had abnormally hard stools (BSFS  
140 1-2).

141 ***Assessment of secretory IgA in stool***

142 The concentrations of microbe bound IgA1/2 (Fig. 2A) and free IgA1/2 (Fig. 2B) were  
143 measured by ELISA with no evidence of a significant difference between severe ME/CFS

144 patients and their matched household controls. Flow cytometry was used to determine the  
145 distribution of IgA coating on stool microbes (Fig. 3A and 3B). When comparing the  
146 proportion of stool microbes coated by IgA there was no evidence of any differences between  
147 patients and matched controls (Fig. 3C). Based on the microbial load of stool samples  
148 (Supplementary Fig. S2) the relative quantification of IgA bound microbes was converted to  
149 absolute values which again revealed no evidence of differences between patients and  
150 matched controls in the quantity of IgA coated microbes within stool samples (Fig. 3D).

### 151 *Severe ME/CFS patients have a reduced serum IgG immune response to stool microbes*

152 To determine whether immune tolerance to intestinal microbes was altered in severe ME/CFS  
153 patients the level of serum IgG antibodies bound to both their own (autologous) stool  
154 microbes and to non-self (heterologous) stool microbes from other individuals were measured  
155 in patients and their matched household controls (Fig. 4A). Four patients had lower serum  
156 IgG reactivity to indigenous stool microbes than their matched household controls ( $p =$   
157  $0.07322$ ) and all patients had lower serum IgG reactivity to foreign stool microbes than their  
158 matched household controls ( $p = 0.006334$ ) (Fig. 4B). Furthermore, there was evidence for  
159 controls having higher serum IgG reactivity to heterologous (patient) stool microbes than  
160 serum IgG reactivity to autologous stool microbes ( $p = 0.0317$ ). In contrast, for patients there  
161 was no evidence for a difference in serum IgG reactivity to autologous and heterologous  
162 (control) stool microbes ( $p = 0.3619$ ). In addition, serum IgG reactivity to patients  
163 (heterologous) stool microbes in control individuals was higher than serum IgG reactivity to  
164 autologous stool microbes in patients ( $p = 0.003751$ ). A paired t-test of the averaged IgG  
165 levels to indigenous and foreign stool microbes within individuals suggests that patients had a  
166 lower IgG reactivity to stool microbes than controls irrespective of the source of the microbes  
167 ( $p = 0.0185$ ). Of note, the reduced levels of patient IgG antibodies to indigenous and foreign  
168 stool microbes were not due to lower levels of serum IgG in patients (Fig. 4C).

169 ***The proportion of microbes bound by serum IgG is high in both patients and controls***

170 We next sought to determine how much of the stool microbiome was recognised by serum  
171 IgG by measuring the proportion of indigenous stool microbes coated by serum IgG (Fig. 5A  
172 and 6B). There was no evidence for any differences in the proportion of stool microbes  
173 coated by IgG ('IgG positive') in severe ME/CFS patients compared with controls (Fig. 5C).

174 ***Characterising the stool microbiome***

175 Using whole metagenome shotgun sequencing the microbial composition of SYBR Green<sup>+</sup>  
176 ('all') stool microbes isolated by fluorescent activated cell sorting (FACS) was determined  
177 (Supplementary Fig. S3). The average number of 'all' microbes collected by FACS was 1.47  
178 million. Taxa with a relative abundance greater than  $1 \times 10^{-6}$  were included in downstream  
179 analyses and comparisons made at the genus and species level.

180 At the genus level 275 taxa were detected. The 15 most abundant genera across all  
181 ME/CFS and matched household control samples (n = 10) were *Bacteroides* (10.4%),  
182 *Phocaeicola* (10.1%), *Clostridioides* (9.5%), *Lysobacter* (9.4%), *Faecalibacterium* (8.6%),  
183 *Blautia* (7.1%), *Roseburia* (5.8%), *Anaerostipes* (5.5%), *Akkermansia* (4.4%),  
184 *Campylobacter* (2.9%), *Agrobacterium* (2.6%), *Methanobrevibacter* (1.9%), *Bifidobacterium*  
185 (1.9%) *Anaerobutyricum* (1.5%) and *Streptococcus* (1.3%) (Supplementary Fig. S3A).

186 At the species level 705 taxa were detected. The 15 most abundant species across all  
187 ME/CFS and matched household control samples (n = 10) were *Clostridioides difficile*  
188 (9.5%), *Lysobacter enzymogenes* (9.4%), *Faecalibacterium prausnitzii* (8.6%), *Phocaeicola*  
189 *dorei* (6.4%), *Blautia* sp. SC05B48 (6.3%), *Anaerostipes hadrus* (5.4%), *Roseburia*  
190 *intestinalis* (4.5%), *Akkermansia muciniphila* (4.3%), *Bacteroides uniformis* (3.7%),  
191 *Phocaeicola vulgatus* (3.6%), *Agrobacterium tumefaciens* (2.5%), *Methanobrevibacter*



192 *smithii* (1.8%), *Bacteroides cellulosilyticus* (1.6%), *Anaerobutyricum hallii* (1.5%) and  
193 *Campylobacter jejuni* (1.5%) (Supplementary Fig. S3C).

194 Using three measures of intra-sample diversity, the Shannon index, inverse Simpson  
195 index and observed richness, there was no evidence for differences in any of the alpha  
196 diversity measures between severe ME/CFS patients and matched household controls at the  
197 species level (Supplementary Fig. 4A).

198 Due to the large variation in microbial load in stool samples from severe ME/CFS  
199 patients ( $6.3 \times 10^{10}$  cells/gram to  $2.6 \times 10^{11}$  cells/gram) and controls ( $1.2 \times 10^{11}$  cells/gram to  
200  $2.0 \times 10^{11}$  cells/gram) (Supplementary Fig. S2), converting relative abundances to absolute  
201 abundances increased the heterogeneity amongst samples at both the genus and species levels  
202 (Supplementary Fig. S3B and S2D). However, analysis of beta diversity using Bray-Curtis  
203 dissimilarity identified subtle changes in both relative microbiome profiles (RMP) and  
204 quantitative microbiome profiles (QMP). Samples from patients in pairs three, four and five  
205 were most dissimilar to the other samples while samples from patients in pairs one and two  
206 clustering together with their matched household controls (Supplementary Fig. S4B).

207 Functional differences in the microbiome of patients and controls were determined by  
208 comparing the abundance of gene families in the ‘all’ fraction. A total of 464,263 gene  
209 families were detected in all participants above the threshold. A further filtering step removed  
210 gene families below the threshold in more than seven samples, leaving 84,888 gene families  
211 for evaluation. PCA was used to reduce the number of variables by defining principal  
212 components (PC) that highlighted the largest sources of variation amongst the samples. PC4  
213 identified 11% of variation in functional genes families amongst samples that were  
214 attributable to disease status (Supplementary Fig. S5).

215 ***IgG-Seq identifies antimicrobial signatures unique to each participant***

216 Next, IgG-Seq was used to characterise the indigenous gut microbes bound by serum IgG in  
217 severe ME/CFS patients and matched household controls. Briefly, ‘IgG positive’ and ‘IgG  
218 negative’ microbes were isolated by FACS from bulk stool samples and processed for  
219 shotgun metagenomic sequencing to identify taxa preferentially bound by serum IgG (Fig.  
220 6A and 6B). The mean number of ‘IgG positive’ microbes collected by FACS was  $1.05 \times 10^6$ .  
221 The mean number of ‘IgG negative’ microbes isolated by FACS was  $1.30 \times 10^6$ . Taxa with a  
222 relative abundance greater than  $1 \times 10^{-5}$  in the ‘all’ fraction were included in the ‘IgG  
223 positive’ and ‘IgG negative’ fractions for downstream analyses. Taxonomic comparisons  
224 were made at the species level.

225 Observed richness scores were applied to rarefied reads to determine the number of  
226 microbial species with serum IgG reactivity (Fig. 6C). All participants had more than 200  
227 species in the ‘IgG positive’ fraction with a high number of species also identified in the ‘IgG  
228 negative’ fraction. Both patients and controls had a higher mean number of species in their  
229 ‘IgG negative’ fraction than their ‘IgG positive’ fraction (365 vs 339 in patients and 358 vs  
230 322 in controls). However, most participants had a small number of species (<30) exclusively  
231 in the ‘IgG negative’ fraction at a relative abundance  $>1 \times 10^{-5}$ , except for the patient from  
232 pair three who had 107 species exclusively in their ‘IgG negative’ fraction (Table 2). In  
233 addition, this patient also had a smaller proportion of species recognised by IgG compared  
234 with all other participants (Table 2).

235 Next, we assessed the similarity/difference between ‘IgG positive’ and ‘IgG negative’  
236 fractions in patients and controls using the Bray-Curtis index and visualising distances using  
237 an NMDS plot (Fig. 6D). ‘IgG positive’ and ‘IgG negative’ fractions from the same  
238 participant shared the greatest similarity. No clustering was seen for either fraction in patients  
239 or controls. The ‘IgG positive’ and ‘IgG negative’ fractions from patients in pairs three and  
240 five were most dissimilar to the other samples.

241 Using the probability ratio developed by Jackson et al., (2021)<sup>25</sup> we scored IgG  
242 binding by directly measuring the likelihood of a species being bound by IgG. Positive IgG  
243 probability ratios indicate that a species is more likely to be coated with IgG and reside in the  
244 ‘IgG positive’ fraction. Conversely, negative IgG probability ratios indicate that a species is  
245 more likely to be uncoated and reside in the ‘IgG negative’ fraction. Probability ratios are not  
246 influenced by the relative abundance of a species within the ‘all’ fraction and therefore  
247 measure the quantity of IgG produced against a given species. Of the 423 species detected at  
248 a relative abundance greater than  $10^{-5}$ , 101 species were detected in every participant and  
249 therefore used in downstream analysis. It is worth noting that despite detecting species falling  
250 into the bacteria, fungi, archaea and virus kingdoms, only bacterial species were detected in  
251 every participant and consequently used in downstream analysis. Notably, owing to the way  
252 in which probability ratios are calculated they tend to be similar across species within  
253 participants, with some having consistently lower estimates across all species than others,  
254 driven by their overall IgG probability ratio. Probability ratio scores varied amongst species  
255 and participants. Each participant had a unique combination of probability ratio scores for  
256 different species (Fig. 7). We were unable to meaningfully test for differences in probability  
257 ratio scores between patients and controls for individual species due to the small sample size  
258 and lack of power to detect significant changes.

259 Finally, we analysed the function of the microbial communities within the ‘IgG  
260 positive’ and ‘IgG negative’ fractions by analysing the likelihood of a gene family being  
261 present in a microbe bound by IgG. IgG probability ratios were calculated for the 1724 gene  
262 families that were detected in all participants above the threshold. Using a PCA plot to assess  
263 how the ten samples varied with regards to the likelihood of certain gene families being  
264 present in microbes bound by IgG (Supplementary Fig. S6), a separation between severe

265 ME/CFS patients and controls from four households was observed (PC2), corresponding to  
266 13% of explained variance.

267

268 **Discussion:**

269 This feasibility study highlights the logistical challenges of including severe, house- or  
270 bedbound ME/CFS patients in research studies and collecting biological samples. Contrary to  
271 our initial hypothesis, our findings from a small cohort of patients and controls suggests that  
272 severe ME/CFS patients may have a reduced serum IgG immune response to stool microbes.

273 *Lessons learnt for the inclusion of severe ME/CFS patients in biomedical research*

274 Despite their significant disability severe ME/CFS patients were enthusiastic and eager to  
275 participate in our study with a 58% response rate. However, severe ME/CFS often coincided  
276 with additional illness complications that excluded these individuals from the study,  
277 hindering recruitment. We also found that symptom severity of house- or bedbound ME/CFS  
278 patients fluctuated, making it difficult to arrange home study visits. The wide geographical  
279 distribution of participants' homes (30 – 140 miles from the research institute) restricted  
280 sample collection with a minimum of two hours required for sample collection and  
281 transportation to the laboratory.

282 We recruited controls from the same household as the patient to account for  
283 environmental confounders of microbiome analyses such as living conditions and diet<sup>26,27</sup>.  
284 Previous studies have shown that inclusion of same household controls enables identification  
285 of ME/CFS disease-specific microbiome changes<sup>28</sup>. However, the requirement for a matched  
286 healthy household control impacted on patient recruitment. Amongst patients not meeting the  
287 study eligibility criteria, 44% were excluded due to being unable to identify a matched  
288 household control. Considering that household controls were typically carers and parents or

289 spouses of the patient, it was not possible to match age and gender of patients and controls,  
290 both of which are confounding variables for immunological<sup>29,30</sup> and microbiome studies<sup>31</sup>.  
291 Other confounders potentially discordant amongst patients and controls were BMI, exercise  
292 and medications. Our finding of a sparse clustering between results from severe ME/CFS  
293 patients and matched household controls suggests that these and perhaps other confounding  
294 variables had an influence on immune response to the intestinal microbiome. Future studies  
295 should consider including and accounting for as many of these confounding variables in  
296 analysis as possible.

### 297 ***Severe ME/CFS patients have serum IgG hyporeactivity to stool microbes***

298 The hypothesis guiding our study was that ME/CFS patients have increased intestinal  
299 permeability due to an altered microbiome, which results in translocation of intestinal  
300 microbes into the circulation, triggering an immune response. Despite the low study sample  
301 size, we found evidence that severe ME/CFS patients in fact have lower serum IgG levels  
302 reactive to stool microbes than their matched household controls. This appears to be a  
303 property of the patients' immune responses, rather than their microbiome which structurally  
304 and functionally closely resembled that of their matched controls. Our findings mirror the  
305 findings from pioneering studies investigating immune reactivity to faecal microbes in IBD  
306 patients which demonstrated that healthy controls have higher serum IgG reactive to  
307 heterologous stool microbes than to autologous stool microbes<sup>15</sup>. In our study heterologous  
308 reactivity was measured using samples from individuals living in the same household which  
309 are known to display greater similarity to patients' microbiomes than individuals living in  
310 different households<sup>32</sup>. This should increase confidence in identifying microbes that  
311 distinguish the microbiome of patients from controls as being a property of the disease.  
312 Despite this advantage there were no differences in alpha diversity measures between severe  
313 ME/CFS patients and matched household controls at the genus or species level. Instead, our

314 findings provide initial evidence for immune dysfunction in ME patients manifesting as a  
315 reduced capacity and reactivity of serum IgG to stool microbes irrespective of their source.  
316 Previous studies have described IgG immunodeficiencies in ME<sup>33</sup> which could explain why  
317 we found reduced levels of serum IgG binding to stool microbes in severe ME/CFS patients.  
318 However, there was no evidence of IgG immunodeficiencies in our severe ME/CFS patient  
319 cohort. Instead, it may be attributable to IgG antibody repertoires and a less diverse repertoire  
320 of antibodies directed at intestinal microbes. The loss of antibody diversity occurs naturally  
321 during ageing and is a defining feature of immune senescence and declining immune function  
322 in later life<sup>34</sup>. The possibility of premature or accelerated immunosenescence should be a  
323 focus of future studies, particularly as it relates to effector immune cells whose functionality  
324 is compromised in ME patients, as previously described for NK cells<sup>35</sup>, and here for B cells.  
325 An additional possibility relates to immune hibernation in ME/CFS patients which produces a  
326 hypometabolic state<sup>36</sup> that may limit lymphocyte responsiveness to foreign antigens and  
327 increased tolerance to bacterial endotoxins<sup>37</sup>.

### 328 *Limitations of the study in addressing the study hypothesis*

329 The severe ME/CFS patients recruited to this pilot study had comorbid IBS, whereas  
330 household controls were free of any GI complaints. IBS comorbidity is a confounding  
331 variable in ME/CFS microbiome studies as defined microbiome profiles have been described  
332 that discriminate between patients with and without IBS comorbidity<sup>9</sup>. To establish whether  
333 the results found in this pilot study of severe ME patients are disease specific future studies  
334 should compare severe ME/CFS patients with and without comorbid IBS and compare severe  
335 ME/CFS patients with comorbid IBS to IBS patients.

336 We were unable to confirm the presence of increased intestinal permeability within  
337 the severe ME/CFS patient cohort. Based upon previous studies most ME patients (~67%)

338 will have increased intestinal permeability compared with healthy controls<sup>13</sup>. An intact  
339 intestinal barrier in the severe ME/CFS patients recruited to this study might explain why  
340 they did not have increased IgG reactivity to autologous stool bacteria compared with their  
341 matched healthy household controls. It has been shown that levels of IgG reactive to  
342 autologous stool bacteria are elevated in other diseases associated with increased intestinal  
343 permeability such as Crohn's disease<sup>16</sup>. Future studies should seek to establish the integrity of  
344 the intestinal barrier in severe ME/CFS patients.

345         The IgG-Seq protocol used in this research identified serum IgG produced in response  
346 to bacteria and fungi. Whilst excluding reactivity to other constituents of the intestinal  
347 microbiome in the current study, the method can be adapted to detect IgG reactivity to viruses  
348 and archaea that can then be identified and isolated using FACS.

### 349 ***Conclusion***

350 Severe ME patients have historically been excluded from research studies. This pilot study  
351 demonstrates the feasibility and challenges associated with including this important and  
352 growing population of ME patients in research. In providing evidence of immune dysfunction  
353 in severe ME/CFS patients, expressed as hyporesponsive serum IgG responses to intestinal  
354 microbes, this study also provides the theoretical and methodological basis and rationale for  
355 undertaking more detailed immune function studies in larger cohorts of ME patients.

356

### 357 **Patients and Methods**

#### 358 ***Participant recruitment***

359 Ten volunteers were enrolled onto this study between 2018 and 2019: Five severe ME/CFS  
360 patients and, as controls, five healthy individuals that were the patients' carers and living in

361 the same household. Severe ME/CFS participants were recruited by the tertiary referral  
362 centres Epsom and St Helier University Hospitals (ESTH) CFS Service, Carshalton, UK, and  
363 the East Coast Community Healthcare Centre (ECCHC) ME/CFS service, Lowestoft, UK.  
364 All severe ME/CFS patients had a confirmed diagnosis of ME/CFS based on a hybrid of the  
365 NICE 2007 guidelines<sup>38</sup> and the CDC-1994 criteria<sup>39</sup> and defined as experiencing at least four  
366 of the following symptoms for a minimum of 4 months; cognitive difficulties, muscle pain,  
367 multi-joint pain, new headaches, recurrent sore throats, cervical/axillary lymphadenopathy,  
368 unrefreshing sleep and post exertional malaise. Severity was based on being unable to  
369 undertake activities associated with daily living, wheelchair dependency for mobility and  
370 being house- or bedbound and requiring aid for washing, using the toilet and eating. All  
371 patients were asked to complete the Chalder fatigue questionnaire, shortened medical  
372 outcomes study 36-item short form health survey (SF-36), hospital anxiety and depression  
373 scale (HADS), a self-efficacy questionnaire, visual analogue pain rating scale and the  
374 Epworth sleepiness scale. Matched household controls were defined as individuals who were  
375 living with or caring for the severe ME/CFS patient. Matched household controls were  
376 excluded if they had a long-term medical condition, in particular gastrointestinal conditions,  
377 autoimmune diseases, anxiety, or depression; or were receiving immunomodulatory drugs,  
378 statins, beta blockers or steroids. Participants consuming antibiotics or probiotic capsules  
379 within the 6 weeks prior to sample collection were excluded.

380 The study was performed in accordance with the Declaration of Helsinki and the  
381 International Conference on Harmonisation Good Clinical Practice (ICH GCP) Guideline,  
382 and in compliance with national law. The research was approved by the NHS Health  
383 Research Authority London Hampstead Research Ethics Committee (REC 17/LO/1102,  
384 IRAS ID 218545). This study was registered on the [clinicaltrials.gov](https://clinicaltrials.gov) database  
385 (NCT03254823). All participants provided fully informed written consent. The collection,



386 storage and use of human tissue samples was carried out within the terms of the Human  
387 Tissue Act 2004 (Human Tissue Authority).

### 388 *Sample collection and processing*

389 Fresh stool and blood samples were collected from each participant within a 24 h window  
390 during a home visit. Twenty millilitres of blood were collected in serum separator tubes (BD  
391 Vacutainer). Serum was separated from whole blood following the manufacturers protocol  
392 and immediately stored at -80°C. Stool samples were collected immediately after defecation  
393 in a Fecotainer® (AT Medical BV) with an Oxoid™ AnaeroGen™ compact sachet (Thermo  
394 Scientific) to preserve anaerobic bacteria. The consistency and appearance of fresh stool  
395 samples was recorded using the Bristol stool form scale (BSFS)<sup>40</sup>. Stool samples were stored  
396 at 4°C for <24 h. Following homogenisation aliquots of the bulk homogenate and of 40%  
397 stool microbial glycerol suspensions were stored at -80°C. Glycerol stocks were prepared by  
398 diluting stool samples (10% w/v) with PBS, collecting the supernatant following  
399 centrifugation at 300g for 5 min at 20°C and diluted 1:1 with 80% v/v glycerol.

### 400 *Stool water content*

401 Non-diluted aliquots of stool were weighed before and after freeze drying using the  
402 ModulyoD freeze dryer (Thermo Electron Corp.) for 12 h. Water content was calculated  
403 using the following equation.

$$\frac{(\text{wet weight} - \text{dry weight})}{\text{wet weight}} \times 100$$

### 404 *Stool microbial load*

405 Non-diluted stool aliquots were thawed on ice and diluted (1% w/v) with PBS solution  
406 containing 0.1% w/v BSA fraction V. Samples were homogenised using a Kimble™  
407 Kontes™ Pellet Pestle™ Cordless motor and filtered through a 70 µm cell strainer. Filtered

408 microbial suspensions were diluted 1:1600, 1:3200 and 1:6400; then 200µl of each dilution  
409 were incubated with 10µl of 1:100 SYBR™ Green I nucleic acid gel stain (Thermofischer  
410 Scientific) for 30 min. Microbial load was determined using the Guava® easyCyte™ 5HT  
411 equipped with a 488 nm laser. Prior to sample acquisition the instrument was cleaned  
412 following manufacturers' instructions and calibrated using the Guava® easyCheck™ kit.  
413 Stool microbes (SYBR Green+ events) were enumerated using Guava® Suite Software v3.3.

#### 414 *Stool IgA concentration*

415 Non-diluted stool aliquots were thawed on ice, diluted (10% w/v) with 0.2M NaHCO<sub>3</sub>, pH  
416 9.4 and homogenised using a Kimble™ Kontes™ Pellet Pestle™ Cordless motor. Samples  
417 were centrifuged twice at 16,000g for 5 min at 20°C and after both rounds of centrifugation  
418 the pellet and supernatant were separated. The supernatants were pooled and used to analyse  
419 free secretory IgA (sIgA) by ELISA. The pellet was washed and resuspended to the original  
420 volume and used to analyse microbe associated/bound sIgA by ELISA. All reactants except  
421 for the blocking solution and wash buffers were added in volumes of 100 µl/well. All washes  
422 were repeated three times with PBS and 0.05% Tween™ 20 unless otherwise stated. Nunc  
423 MaxiSorp™ flat-bottom plates (Thermo Fisher Scientific) were coated for 16h at 4°C with  
424 10-fold serial dilutions (1 to 1:1000000) of samples and with 2-fold serial dilutions (250-3.9  
425 ng/ml) of a human colostrum IgA standard (Sigma), diluted with 0.2M NaHCO<sub>3</sub>, pH 9.4.  
426 Samples and standards were plated in duplicate. Plates were washed and then blocked for 3h  
427 with 300µl/well of PBS, 0.05% Tween™ 20, 2% BSA fraction V, 1% normal mouse serum  
428 (Thermo Fisher Scientific). Plates were washed and then incubated with 1000 ng/ml biotin  
429 conjugated mouse anti-human IgA1/IgA2 monoclonal antibody (Pharmingen) diluted in PBS,  
430 0.05% Tween™ 20, 2% BSA fraction V, 1% normal mouse serum. After 1h of incubation at  
431 20°C plates were washed and incubated with 1:80000 HRP-Conjugated Streptavidin (Thermo  
432 Fisher Scientific) diluted in PBS, 0.05% Tween™ 20, 2% BSA fraction V, 1% normal mouse

433 serum for 30 min at 20°C. Plates were washed six times and incubated with TMB high  
434 sensitivity substrate solution (BioLegend® UK Ltd) for 5 min. The addition of 2N H<sub>2</sub>SO<sub>4</sub>  
435 stopped the reaction and absorbances were read at 450 nm. IgA sample values were  
436 determined by reference to standard curves.

#### 437 *Serum IgG quantification*

438 Total serum IgG was measured using the commercial Invitrogen ELISA kit (Thermo Fisher  
439 Scientific). Samples were measured in duplicate.

#### 440 *Serum IgG levels to autologous and heterologous stool microbes*

441 Glycerol stocks of stool microbes were thawed and washed three times with PBS at 8000g for  
442 5 min at 20°C. The pellet was resuspended in 1ml PBS. Serial dilutions (2-fold) of stool  
443 microbes in PBS were plated in duplicate in a 96-well flat bottom Corning™ Costar™ 9018  
444 plate. Absorbances were read at 570 nm and stool microbes were resuspended to an optical  
445 density of 0.05 with 0.1M NaHCO<sub>3</sub>, pH 9.4.

446 Serum IgG reactivity to autologous ('self') or heterologous ('non-self', matched  
447 patient or control) stool microbes was measured by ELISA. All washes were repeated three  
448 times with 200 µl/well PBS and 0.1% Tween™ 20 unless otherwise stated. Nunc  
449 MaxiSorp™ flat-bottom plates (Thermo Fisher Scientific) were coated for 16h at 4°C with  
450 100 µl/well of stool microbes. Plates were washed and then blocked for 3h at room  
451 temperature under agitation with PBS, 2% BSA fraction V, 1% normal goat serum (Sigma-  
452 Aldrich). Plates were incubated for 1 h at 20°C with 50 µl/well of complement inactivated  
453 serum samples 2-fold serially diluted (1:80-1:320) in PBS, 2% BSA fraction V, 1% normal  
454 goat serum. Plates were washed and incubated for 1h at room temperature under agitation  
455 with 100 µl/well of 1:500 goat anti-human IgG H&L (HRP) (Abcam,) diluted in PBS, 2%  
456 BSA fraction V, 1% normal goat serum. Plates were washed six times and incubated with

457 TMB high sensitivity substrate solution (BioLegend® UK Ltd) for 5 min at 20°C. The  
458 addition of 0.16M H<sub>2</sub>SO<sub>4</sub> stopped the reaction and absorbances were read at 450 nm. Results  
459 were normalised by subtracting serum only absorbance readings from sample readings.

#### 460 *Microbial flow cytometry*

461 Systemic IgG and faecal IgA binding to stool microbes was assessed by microbial flow  
462 cytometry. All buffers were filter sterilised using a 0.22-µm filter before use. Aliquots of  
463 non-diluted stool samples were processed and the microbial concentration in each stool  
464 sample measured as described earlier. Microbes were resuspended to 2 x 10<sup>6</sup> cells/ml in PBS  
465 with 0.1% BSA. 500µl of complement inactivated serum was diluted 1:100 in PBS with 0.1%  
466 BSA and incubated for 30 min at 20°C with 200 µl of 1 x 10<sup>6</sup> cells/ml of stool microbes. For  
467 secretory IgA measurements stool microbes were not incubated with serum. Samples were  
468 washed in PBS with 0.1% BSA (5 min, 1.2 x 10<sup>4</sup> rpm) and microbes were resuspended to 1 x  
469 10<sup>6</sup> cells/ml and incubated with 1:1000 SYBR<sup>TM</sup> Green I nucleic acid gel stain and 1:100  
470 secondary conjugated antibodies (anti-human IgA-APC (Miltenyi Biotec) and anti-human  
471 IgG-APC/Cy7 (BioLegend) or their respective isotype controls. Samples were fixed with  
472 0.75% v/v paraformaldehyde. Acquisition of cellular events was performed using the BD  
473 LSRFortessa<sup>TM</sup> (BD Biosciences) and analysed using FlowJo<sup>TM</sup> software. Frequencies of  
474 antibody bound stool microbes were expressed as percentages. The percentage of Ig-bound  
475 microbes was normalised by subtracting frequency of Ig-bound microbes measured using  
476 isotype controls.

#### 477 *Metagenomic shotgun sequencing analysis of total gut microbiota and IgG-coated* 478 *microbes (IgG-Seq)*

#### 479 *Microbial cell sorting*

480 Non-diluted stool samples were processed and stained for IgG flow cytometry analysis as  
481 described previously. Isotype controls were not used in microbial cell sorting. Microbes were  
482 diluted to  $1 \times 10^7$  cells/ml and cell sorting achieved using the Sony SH800S cell sorter  
483 equipped with four lasers: 488 nm, 405nm, 638nm and 651nm. Prior to sample acquisition  
484 the instrument was cleaned and calibrated according to the manufacturer's instructions.  
485 Microbes ( $1 \times 10^6$ ) were collected from the following three fractions: 1) 'all' (SYBR<sup>+</sup>  
486 microbes), 2) 'IgG positive' (SYBR<sup>+</sup>IgG<sup>+</sup>), 3) 'IgG negative' (SYBR<sup>+</sup>IgG<sup>-</sup>). Fractions were  
487 centrifuged and immediately stored at -20°C as dry pellets.

#### 488 *DNA extraction, processing and sequencing*

489 DNA was extracted using the Gram-positive bacteria genomic DNA purification protocol  
490 from the GeneJET DNA genomic DNA purification kit (Thermoscientific) with the following  
491 modifications: 1) 0.52 kU/ml achromopeptidase was added to the lysis buffer and the  
492 incubation time increased to 60 min; 2) incubation with lysis solution and proteinase K was  
493 increased to 50 min. DNA was precipitated using 0.7X solid phase reversible immobilisation  
494 bead clean-up with KAPA pure beads (Roche). Whole genome amplification was performed  
495 using the REPLI-g advanced DNA single cell kit (QIAGEN). The quality and quantity of  
496 amplified genomic DNA were determined using the Agilent Tapestation 4200 and the  
497 Quanti-iT™ dsDNA high sensitivity assay kit (Thermo Fisher Scientific). A ready-to-load  
498 pooled sequencing library was prepared by the in-house QIB sequencing service using the  
499 Illumina DNA prep kit (Illumina, 20018704) and the KAP2G Robust PCR kit (Sigma),  
500 followed by sequencing using 2 x 150 bp paired-end chemistry (PE150) on the Illumina  
501 NovaSeq 6000 platform (Novogene Ltd., UK).

502 Paired-end sequencing reads were provided as FASTQ format. All raw sequencing  
503 reads were pre-processed using tools retrieved from the BioConda repository<sup>41</sup>. SeqFu

504 (v1.8.5)<sup>42</sup> was used to assess the quality of raw sequencing reads and those bases below  
505 Phred quality score of 15 were removed using Fastp (v0.20.0)<sup>43</sup>. Human genomic DNA  
506 identified by Kraken2<sup>44</sup> against the Genome Reference Consortium Human Build 37  
507 (GRCh37/hg19) database were removed. Taxonomic assignment of remaining sequencing  
508 reads was done using Kraken2<sup>44</sup> against the ‘PlusPF’ database containing archaea, bacteria,  
509 viral, plasma, human1, UniVec\_Core, Protozoa and Fungi  
510 <https://benlangmead.github.io/aws-indexes/k2>. Abundance of reads at the species level was  
511 estimated using Bracken<sup>45</sup>. Taxonomic read counts were converted to relative abundances by  
512 total sum scaling to 1.

### 513 *Relative and quantitative microbiome profiling*

514 The ‘all’ fraction from microbial cell sorting was used for relative microbiome profiling  
515 (RMP) and quantitative microbiome profiling (QMP). The cut off threshold of  $1 \times 10^{-6}$  was  
516 applied to relative abundances and a pseudocount of  $1 \times 10^{-7}$  was added. The microbial load  
517 of each species was calculated on these modified relative abundances using the equation  
518 below.

$$absolute\ abundance\ (cells/g)_{ij} = RA_{ij} \times total\ cell\ concentration\ (cells/g)_j$$

### 519 *Analysing IgG binding of taxa*

520 RMP data was used for IgG binding analysis with a cut off threshold of  $1 \times 10^{-5}$ . In addition,  
521 for each participant if a species was not detected in the ‘all’ fraction above the threshold then  
522 this species was subsequently removed from respective ‘IgG positive’ and ‘IgG negative’  
523 fractions. The ‘IgAScores’ (v.0.1.2)<sup>25</sup> R package was used to calculate IgG probability ratios  
524 using the ‘igascores’ function with method set to ‘probratio’, pseudocount ‘c’ set to  $1 \times 10^{-5}$   
525 and ‘scaleratio’ set to TRUE.

$$probability\ ratio_{ij} = \log_2 \left( \frac{(IgG_{ij}^+ \times Fraction\ size_j^{IgG^+}) + c}{(IgG_{ij}^- \times Fraction\ size_j^{IgG^-}) + c} \right)$$

526 *Alpha diversity*

527 The diversity function from the ‘vegan’ R package (v.2.5-7)<sup>46</sup> was used to calculate Shannon  
528 indices and inverse Simpson indices. The rarefy function from ‘vegan’ (v.2.5-7)<sup>46</sup> was used  
529 to rarefy reads to the lowest sequencing depth. Observed species’ richness was the number of  
530 species remaining following rarefaction.

531 *Beta diversity*

532 The vegdist function from ‘vegan’ (v.2.5-7)<sup>46</sup> was used to calculate Bray-Curtis indices on  
533 relative abundances. The metMDS function from ‘vegan’ (v.2.5-7)<sup>46</sup> was used to performed  
534 non-metric multidimensional scaling (NDMS) on Bray-Curtis indices.

535 *Functional analysis*

536 Gene families were identified using the HMP Unified Metabolic Analysis Network 3.0  
537 (HUMANn 3.0) package from the bioBakery suite<sup>47,48</sup>. In all participants each gene family  
538 was filtered by the following criteria: if a gene family was not present in the ‘all’ fraction the  
539 reads per kilobase (RPK) were zeroed in the ‘IgG positive’ and ‘IgG negative’ fractions of  
540 that participant. The humann\_renorm\_table utility script from HUMANn 3.0 was used to  
541 convert gene families from RPK to relative abundances. Community level classifications of  
542 gene families were used in downstream analysis. A cut off threshold of  $1 \times 10^{-6}$  was applied  
543 to all samples.

544 To analyse gene families in the microbiome of severe ME/CFS patients compared  
545 with household controls the ‘all’ fraction was used. Gene families that were below the  
546 threshold in seven or more samples were discarded from downstream analysis. The clr

547 function from the ‘compositions’ R package (v 2.0-4)<sup>49</sup> was used to CLR transform the  
548 relative abundance of gene families. The `pca` function from the ‘mixOmics’ R package (v  
549 6.18.1)<sup>50</sup> was used to perform principal component analysis (PCA) on gene families. Severe  
550 ME/CFS patients and their matched household controls were not treated as paired samples in  
551 this analysis.

552 To analyse gene families of IgG reactive microbes IgG probability ratios were  
553 calculated using the relative abundance of gene families in the ‘IgG positive’ fraction and the  
554 ‘IgG negative’ fraction as described earlier, with a pseudocount set to  $6 \times 10^{-6}$ . Gene families  
555 that did not have IgG probability ratios in all samples were discarded from downstream  
556 analysis. PCA was then performed as described previously.

### 557 *Statistical analysis*

558 Statistical analyses and graphical representations were performed in R using the following  
559 packages: ‘ggplot2’ (v3.4.0)<sup>51</sup>, ‘reshape2’ (v1.4.4)<sup>52</sup>, ‘data.table’ (v1.14)<sup>53</sup>, ‘dplyr’ (v1.1.0)  
560 <sup>54</sup>, ‘ggpubr’ (V0.5.0)<sup>55</sup>. Graphs were also made using GraphPad Prism 5.04. Prior to analysis  
561 data were log-transformed if there was evidence for non-normality. Pairwise comparisons  
562 between severe ME/CFS patients and their matched household controls were done using a  
563 two-tailed paired *t*-test. Correlations were assessed with Pearson (*r*) correlation test.

### 564 *Common data elements for ME research*

565 This study used the National Institute of Neurological Disorders and Stroke Common Data  
566 Elements guidelines’ for reporting microbiome/microorganisms biomarkers in ME/CFS  
567 research (<http://www.commondataelements.ninds.nih.gov/>)<sup>56</sup>.

### 568 **Acknowledgements**



569 We acknowledge East Coast Community Healthcare ME/CFS service and the CFS clinic at  
570 Epsom and St Helier University Hospitals NHS Trust for their help recruiting patients, the  
571 QIB Human Research Governance Committee (HRGC) for reviewing the HRA application  
572 and all the research participants who generously shared their time. KAS was supported by a  
573 PhD studentship jointly funded by Invest in ME Research (UK charity number 1153730) and  
574 the University of East Anglia. The authors gratefully acknowledge the support of the  
575 Biotechnology and Biological Sciences Research Council (BBSRC); The authors gratefully  
576 acknowledge the support of the Biotechnology and Biological Sciences Research Council  
577 (BBSRC); this research was supported by the BBSRC Institute Strategic Programme Grant  
578 Gut Microbes and Health BB/R012490/1 and its constituent projects BBS/E/F/000PR10353  
579 and BBS/E/F/000PR10355 (SRC). MD and GS were funded by the BBSRC Core Capability  
580 Grant BB/CCG1860/1.

581 **Declaration of interest statement**

582 The authors report there are no competing interests to declare.

583 **Data availability statement**

584 The raw WMS data are available at the European Nucleotide Archive under study accession  
585 PRJEB61661. (<http://www.ebi.ac.uk/ena/browser/view/PRJEB61661>).

586 **References**

- 587 1 Lim EJ, Son CG. Review of case definitions for myalgic encephalomyelitis/chronic  
588 fatigue syndrome (ME/CFS). *J. Transl. Med.* 2020;18:289. doi: 10.1186/s12967-020-  
589 02455-0. PMID: 32727489.
- 590 2 Pendergrast T, Brown A, Sunnquist M, Jantke R, Newton JL, Strand EB, Jason LA.  
591 Housebound versus nonhousebound patients with myalgic encephalomyelitis and  
592 chronic fatigue syndrome. *Chronic Illn.* 2016;12:292-307. doi:  
593 10.1177/1742395316644770. PMID: 27127189.
- 594 3 Chu L, Valencia IJ, Garvert DW, Montoya, JG. Onset Patterns and Course of Myalgic  
595 Encephalomyelitis/Chronic Fatigue Syndrome. *Front Pediatr.* 2019;7:12. doi:  
596 10.3389/fped.2019.00012. PMID: 30805319.
- 597 4 Lim EJ, Ahn YC, Jang ES, Lee SW, Lee SH, Son CG. Systematic review and meta-  
598 analysis of the prevalence of chronic fatigue syndrome/myalgic encephalomyelitis  
599 (CFS/ME). *J. Transl. Med.* 2020;18:100. doi: 10.1186/s12967-020-02269-0. PMID:  
600 32093722.
- 601 5 Salari N, Khodayari Y, Hosseini-Far A, Zarei H, Rasoulpoor S, Akbari H,  
602 Mohammadi M. Global prevalence of chronic fatigue syndrome among long COVID-  
603 19 patients: A systematic review and meta-analysis. *Biopsychosoc. Med.* 2022;16:21.  
604 doi: 10.1186/s13030-022-00250-5. PMID: 36274177.
- 605 6 Missailidis D, Annesley SJ, Fisher, PR. Pathological Mechanisms Underlying  
606 Myalgic Encephalomyelitis/Chronic Fatigue Syndrome. *Diagnostics (Basel).*  
607 2019;9:80. doi: 10.3390/diagnostics9030080. PMID: 31330791.
- 608 7 Aaron LA, Burke MM, Buchwald D. Overlapping conditions among patients with  
609 chronic fatigue syndrome, fibromyalgia, and temporomandibular disorder. *Arch.*  
610 *Intern. Med.* 2000;160:221-227. doi: 10.1001/archinte.160.2.221. PMID: 10647761.

- 611 8 Giloteaux L, Goodrich JK, Walters WA, Levine SM, Ley RE, Hanson MR. Reduced  
612 diversity and altered composition of the gut microbiome in individuals with myalgic  
613 encephalomyelitis/chronic fatigue syndrome. *Microbiome*. 2016;4:30. doi:  
614 10.1186/s40168-016-0171-4. PMID: 27338587.
- 615 9 Nagy-Szakal D, Williams BL, Mishra N, Che X, Lee B, Bateman L, Klimas NG,  
616 Komaroff AL, Levine S, Montoya JG, et al. Fecal metagenomic profiles in subgroups  
617 of patients with myalgic encephalomyelitis/chronic fatigue syndrome. *Microbiome*.  
618 2017;5:44. doi: 10.1186/s40168-017-0261-y. PMID: 28441964.
- 619 10 Armstrong CW, McGregor NR, Lewis DP, Butt HL, Gooley PR. The association of  
620 fecal microbiota and fecal, blood serum and urine metabolites in myalgic  
621 encephalomyelitis/chronic fatigue syndrome. *Metabolomics*. 2016;13:8. doi:  
622 10.1007/s11306-016-1145-z.
- 623 11 Xiong R, Gunter C, Fleming E, Vernon SD, Bateman L, Unutma. Multi-'omics of gut  
624 microbiome-host interactions in short- and long-term myalgic  
625 encephalomyelitis/chronic fatigue syndrome patients. *Cell Host Microbe*.  
626 2023;31:273-287.e275. doi: 10.1016/j.chom.2023.01.001. PMID: 36758521.
- 627 12 Guo C, Che X, Briese T, Ranjan A, Allicock O, Yates RA, Cheng A, March D,  
628 Hornig M, Komaroff AL et al. Deficient butyrate-producing capacity in the gut  
629 microbiome is associated with bacterial network disturbances and fatigue symptoms  
630 in ME/CFS. *Cell Host Microbe*. 2023;31:288-304.e288. doi:  
631 10.1016/j.chom.2023.01.004. PMID: 36758522.
- 632 13 Maes M, Mihaylova I, Leunis JC. Increased serum IgA and IgM against LPS of  
633 enterobacteria in chronic fatigue syndrome (CFS): indication for the involvement of  
634 gram-negative enterobacteria in the etiology of CFS and for the presence of an

- 635 increased gut-intestinal permeability. *J. Affect. Disord.* 2007;99:237-240. doi:  
636 10.1016/j.jad.2006.08.021. PMID: 17007934.
- 637 14 Shukla SK, Cook D, Meyer J, Vernon SD, Le T, Clevidence D, Robertson CE,  
638 Schrodi SJ, Yale S, Frank DN. Changes in Gut and Plasma Microbiome following  
639 Exercise Challenge in Myalgic Encephalomyelitis/Chronic Fatigue Syndrome  
640 (ME/CFS). *PLoS One.* 2015;10:e0145453. doi: 10.1371/journal.pone.0145453.  
641 PMID: 26683192.
- 642 15 Duchmann R, Neurath MF, Meyer zum Büschenfelde KH. Responses to self and non-  
643 self intestinal microflora in health and inflammatory bowel disease. *Res. Immunol.*  
644 1997;148:589-594. doi: 10.1016/s0923-2494(98)80154-5. PMID: 9588839.
- 645 16 Harmsen HJ, Pouwels SD, Funke A, Bos NA, Dijkstra G. Crohn's disease patients  
646 have more IgG-binding fecal bacteria than controls. *Clin. Vaccine Immunol.*  
647 2012;19:515-521. doi:10.1128/cvi.05517-11. PMID: 22336288.
- 648 17 Ruff WE, Greiling TM, Kriegel MA. Host-microbiota interactions in immune-  
649 mediated diseases. *Nat. Rev. Microbiol.* 2020;18:521-538. doi: 10.1038/s41579-020-  
650 0367-2. PMID: 32457482.
- 651 18 Maes M, Ringel K, Kubera M, Anderson G, Morris G, Galecki P, Geffard M. In  
652 myalgic encephalomyelitis/chronic fatigue syndrome, increased autoimmune activity  
653 against 5-HT is associated with immuno-inflammatory pathways and bacterial  
654 translocation. *J. Affect. Disord.* 2013;150:223-230. doi: 10.1016/j.jad.2013.03.029.  
655 PMID: 23664637.
- 656 19 Quigley EMM. Gut bacteria in health and disease. *Gastroenterol Hepatol (N Y).*  
657 2013;9:560-569. PMID: 24729765.

- 658 20 Keyt BA, Baliga R, Sinclair AM, Carroll SF, Peterson MS. Structure, Function, and  
659 Therapeutic Use of IgM Antibodies. *Antibodies (Basel)*. 2020;9:53. doi:  
660 10.3390/antib9040053. PMID: 33066119.
- 661 21 de Sousa-Pereira P, Woof JM. IgA: Structure, Function, and Developability.  
662 *Antibodies (Basel)*. 2019;8:57. doi: 10.3390/antib8040057. PMID: 31817406.
- 663 22 Vogl T, Kalka IN, Klompus S, Leviatan S, Weinberger A, Segal E. Systemic antibody  
664 responses against human microbiota flagellins are overrepresented in chronic fatigue  
665 syndrome patients. *Sci Adv*. 2022;8:eabq2422. doi: 10.1126/sciadv.abq2422. PMID:  
666 36149952.
- 667 23 Vogl T, Klompus S, Leviatan S, Kalka IN, Weinberger A, Wijmenga C, Fu J,  
668 Zhernakova A, Weersma RK, Segal E. Population-wide diversity and stability of  
669 serum antibody epitope repertoires against human microbiota. *Nat. Med*.  
670 2021;27:1442-1450. doi: 10.1038/s41591-021-01409-3. PMID: 34282338.
- 671 24 Palm NW, de Zoete MR, Cullen TW, Barry NA, Stefanowski J, Hao L, Degan PH,  
672 Hu J, Peter I, Zhang W, et al. Immunoglobulin A coating identifies colitogenic  
673 bacteria in inflammatory bowel disease. *Cell*. 2014;158:1000-1010. doi:  
674 10.1016/j.cell.2014.08.006. PMID: 25171403.
- 675 25 Jackson MA, Pearson C, Ilott NE, Huus KE, Hegazy AN, Webber J, Finlay BB,  
676 Macpherson AJ, Powrie F, Lam LH. Accurate identification and quantification of  
677 commensal microbiota bound by host immunoglobulins. *Microbiome*. 2021;9:33.  
678 doi: 10.1186/s40168-020-00992-w. PMID: 33516266.
- 679 26 Redondo-Useros N, Nova E, González-Zancada N, Díaz LE, Gómez-Martínez S,  
680 Marcos A. Microbiota and Lifestyle: A Special Focus on Diet. *Nutrients*.  
681 2020;12:1776. doi: 10.3390/nu12061776. PMID: 32549225.

- 682 27 Gacesa R, Kurilshikov A, Vich Vila A, Sinha T, Klaassen MAY, Bolte LA, Andreu-  
683 Sánchez S, Chen L, Collij V, Hu S et al. Environmental factors shaping the gut  
684 microbiome in a Dutch population. *Nature*. 2022;604:732-739. doi:10.1038/s41586-  
685 022-04567-7. PMID: 35418674.
- 686 28 Lupo GFD, Rocchetti G, Lucini L, Lorusso L, Manara E, Bertelli M, Puglisi E,  
687 Capelli E. Potential role of microbiome in Chronic Fatigue Syndrome/Myalgic  
688 Encephalomyelitis (CFS/ME). *Sci. Rep.* 2021;11:7043. doi: 10.1038/s41598-021-  
689 86425-6. PMID: 33782445.
- 690 29 Klein SL, Flanagan KL. Sex differences in immune responses. *Nat Rev Immunol.*  
691 2016;16:626-638. doi:10.1038/nri.2016.90. PMID: 27546235.
- 692 30 Milan-Mattos JC, Anibal FF, Perseguini NM, Minatel V, Rehder-Santos P, Castro  
693 CA, Vasilceac FA, Mattiello SM, Faccioli LH, Catai AM. Effects of natural aging and  
694 gender on pro-inflammatory markers. *Braz J Med Biol Res.* 2019;52:e8392. doi:  
695 10.1590/1414-431x20198392. PMID: 31411315.
- 696 31 Vujkovic-Cvijin I, Sklar J, Jiang L, Natarajan L, Knight R, Belkaid Y. Host variables  
697 confound gut microbiota studies of human disease. *Nature*. 2020;587:448-454. doi:  
698 10.1038/s41586-020-2881-9. PMID: 33149306.
- 699 32 Lax S, Smith DP, Hampton-Marcell J, Owens SM, Handley KM, Scott NM, Gibbons  
700 SM, Larsen P, Shogan BD, Weiss S, et al. Longitudinal analysis of microbial  
701 interaction between humans and the indoor environment. *Science*. 2014;345:1048-  
702 1052. doi: 10.1126/science.1254529. PMID: 25170151.
- 703 33 Guenther S, Loebel M, Mooslechner AA, Knops M, Hanitsch LG, Grabowski P,  
704 Wittke K, Meisel C, Unterwalder N, Volk HD, et al. Frequent IgG subclass and  
705 mannose binding lectin deficiency in patients with chronic fatigue syndrome. *Hum.*  
706 *Immunol.* 2015;76:729-735. doi: 10.1016/j.humimm.2015.09.028. PMID: 26429318.

- 707 34 Aiello A, Farzaneh F, Candore G, Caruso C, Davinelli S, Gambino CM, Ligotti ME,  
708 Zareian N, Accardi G. Immunosenescence and Its Hallmarks: How to Oppose Aging  
709 Strategically? A Review of Potential Options for Therapeutic Intervention. *Front.*  
710 *Immunol.* 2019;10:2247. doi: 10.3389/fimmu.2019.02247. PMID: 31608061.
- 711 35 Eaton-Fitch N, du Preez S, Cabanas H, Staines D, Marshall-Gradisnik S. A systematic  
712 review of natural killer cells profile and cytotoxic function in myalgic  
713 encephalomyelitis/chronic fatigue syndrome. *Syst Rev.* 2019;8:279.  
714 doi:10.1186/s13643-019-1202-6. PMID: 31727160.
- 715 36 Naviaux RK, Naviaux JC, Li K, Bright AT, Alaynick WA, Wang L, Baxter A, Nathan  
716 N, Anderson W, Gordon E. Metabolic features of chronic fatigue syndrome. *Proc.*  
717 *Natl. Acad. Sci. U. S. A.* 2016;113:E5472-5480. doi: 10.1073/pnas.1607571113.  
718 PMID: 27573827.
- 719 37 Morris G, Maes M, Berk M, Puri BK. Myalgic encephalomyelitis or chronic fatigue  
720 syndrome: how could the illness develop? *Metab. Brain Dis.* 2019;34:385-415. doi:  
721 10.1007/s11011-019-0388-6. PMID: 30758706.
- 722 38 Baker R, Shaw EJ. Diagnosis and management of chronic fatigue syndrome or  
723 myalgic encephalomyelitis (or encephalopathy): summary of NICE guidance. *BMJ.*  
724 2007;335:446-448. doi: 10.1136/bmj.39302.509005.AE. PMID: 17762037.
- 725 39 Fukuda K, Straus SE, Hickie I, Sharpe MC, Dobbins JG, Komaroff A. The chronic  
726 fatigue syndrome: a comprehensive approach to its definition and study. *International*  
727 *Chronic Fatigue Syndrome Study Group. Ann Intern Med.* 1994;121:953-9. doi:  
728 10.7326/0003-4819-121-12-199412150-00009. PMID: 7978722.
- 729 40 Lewis SJ, Heaton KW. Stool form scale as a useful guide to intestinal transit time.  
730 *Scand J Gastroenterol.* 1997;32:920-4. doi: 10.3109/00365529709011203. PMID:  
731 9299672.

- 732 41 Gruning B, Dale R, Sjödin A, Chapman BA, Rowe J, Tomkins-Tinch CH, Valieris R,  
733 Köster J; Bioconda Team. Bioconda: sustainable and comprehensive software  
734 distribution for the life sciences. *Nat Methods*. 2018;15:475-476. doi:  
735 10.1038/s41592-018-0046-7. PMID: 29967506.
- 736 42 Telatin A, Fariselli P, Birolo G. SeqFu: A Suite of Utilities for the Robust and  
737 Reproducible Manipulation of Sequence Files. *Bioengineering (Basel)*. 2021;8:59.  
738 doi: 10.3390/bioengineering8050059. PMID: 34066939.
- 739 43 Chen S, Zhou Y, Chen Y, Gu J. fastp: an ultra-fast all-in-one FASTQ preprocessor.  
740 *Bioinformatics*. 2018;34:i884-i890. doi: 10.1093/bioinformatics/bty560. PMID:  
741 30423086.
- 742 44 Wood DE, Lu J, Langmead B. Improved metagenomic analysis with Kraken 2.  
743 *Genome Biol*. 2019;20:257. doi: 10.1186/s13059-019-1891-0. PMID: 31779668.
- 744 45 Lu J, Breitwieser FP, Thielen P, Salzberg SL. Bracken: estimating species abundance  
745 in metagenomics data. *PeerJ Computer Science*. 2017;3:e104. doi: 10.7717/peerj-  
746 cs.104
- 747 46 Oksanen J, Simpson GL, Blanchet FG, Kindt R, Legendre P, Minchin PR, O'Hara  
748 RB, Solymos P, Stevens MHH, Szoecs E, et al. `_vegan: Community Ecology`  
749 `Package_`. R package version v.2.6-4. 2022. <[https://CRAN.R-](https://CRAN.R-project.org/package=vegan)  
750 [project.org/package=vegan](https://CRAN.R-project.org/package=vegan)>.
- 751 47 Beghini F, McIver LJ, Blanco-Míguez A, Dubois L, Asnicar F, Maharjan S, Mailyan  
752 A, Manghi P, Scholz M, Thomas AM, et al. Integrating taxonomic, functional, and  
753 strain-level profiling of diverse microbial communities with bioBakery 3. *Elife*.  
754 2021;10:e65088. doi: 10.7554/eLife.65088. PMID: 33944776.



- 755 48 McIver LJ, Abu-Ali G, Franzosa EA, Schwager R, Morgan XC, Waldron L, Segata N,  
756 Huttenhower C. bioBakery: a meta'omic analysis environment. *Bioinformatics*.  
757 2018;34:1235-1237. doi: 10.1093/bioinformatics/btx754. PMID: 29194469.
- 758 49 van den Boogaart KG, Tolosana-Delgado R, Bren M. `_compositions`: Compositional  
759 Data Analysis\_. R package version 2.0-6. 2023. <[https://CRAN.R-  
760 project.org/package=compositions](https://CRAN.R-project.org/package=compositions)>.
- 761 50 Rohart F, Gautier B, Singh A, Lê Cao KA. `mixOmics`: An R package for 'omics  
762 feature selection and multiple data integration. *PLoS Comput Biol*.  
763 2017;13:e1005752. doi: 10.1371/journal.pcbi.1005752. PMID: 29099853.
- 764 51 Wickham, H. `ggplot2`: Elegant Graphics for Data Analysis. New York: Springer-  
765 Verlag; 2016.
- 766 52 Wickham, H. Reshaping Data with the `reshape` Package. *J Stat Soft*. 2007;21:1-20.  
767 doi: 10.18637/jss.v021.i12.
- 768 53 Dowle M, Srinivasan A. `_data.table`: Extension of `data.frame`\_. R package version  
769 1.14.6. 2022. <<https://CRAN.R-project.org/package=data.table>>.
- 770 54 Wickham H, François R, Henry L, Müller K, Vaughan D. `_dplyr`: A Grammar of Data  
771 Manipulation\_. R package version 1.1.0. 2023. <[https://CRAN.R-  
772 project.org/package=dplyr](https://CRAN.R-project.org/package=dplyr)>.
- 773 55 Alboukadel K. `_ggpubr`: 'ggplot2' Based Publication Ready Plots\_. R package version  
774 0.6.0. 2023. <<https://CRAN.R-project.org/package=ggpubr>>.
- 775 56 Grinnon ST, Miller K, Marler JR, Lu Y, Stout A, Odenkirchen J, Kunitz S. National  
776 Institute of Neurological Disorders and Stroke Common Data Element Project -  
777 approach and methods. *Clin Trials*. 2012;9:322-329. doi:  
778 10.1177/1740774512438980. PMID: 22371630.

779

780 Table 1. Severe ME/CFS clinical characteristics

|                                                    | <b>Participants affected (%)</b> | <b>Mean (SD)</b> | <b>Range</b> |
|----------------------------------------------------|----------------------------------|------------------|--------------|
| <b>Age of ME/CFS onset (years)</b>                 | -                                | 25.0 (9.34)      | 12-38        |
| <b>Length of ME/CFS (years)</b>                    | -                                | 8.4 (6.83)       | 2-21         |
| <b>Symptoms</b>                                    |                                  |                  |              |
| Post exertional malaise                            | 100                              | -                | -            |
| Non-restorative sleep                              | 100                              | -                | -            |
| Headaches of a new onset, pattern and severity     | 80                               | -                | -            |
| Recurrent sore throat with enlarged glands in neck | 40                               | -                | -            |
| Impaired concentration                             | 100                              | -                | -            |
| Impaired memory                                    | 80                               | -                | -            |
| Joint pain                                         | 60                               | -                | -            |
| Muscle pain                                        | 80                               | -                | -            |
| Visual and/or auditory hypersensitivity            | 100                              | -                | -            |
| Irritable bowel syndrome                           | 100                              | -                | -            |
| <b>Questionnaire (maximum score)</b>               |                                  |                  |              |
| Shortened SF-36 (30) *                             | -                                | 11.0 (1.73)      | 10-14        |
| Chalder fatigue – physical (28) *                  | -                                | 24.0 (3.67)      | 18-27        |
| Chalder fatigue – mental (16) *                    | -                                | 13.5 (1.12)      | 12-15        |
| HADS – anxiety (21) *                              | -                                | 7.8 (4.55)       | 3-15         |
| HADS – depression (21) *                           | -                                | 6.5 (5.50)       | 3-16         |

|                             |   |              |      |
|-----------------------------|---|--------------|------|
| Self efficacy (60) **       | - | 12.0 (7.35)  | 3-21 |
| Visual analogue (100) *     | - | 62.5 (36.31) | 0-90 |
| Epworth sleepiness (24) *** | - | 7.5 (14)     | 1-14 |

---

\* questionnaire completed by 4 patients

\*\* questionnaire completed by 3 patients

\*\*\* questionnaire completed by 2 patients

781

782

783 Table 2. Proportion of species detected that are recognised by serum IgG

| Pair | Participant | Number of species detected per fraction |           |                    | Proportion of species IgG+ |
|------|-------------|-----------------------------------------|-----------|--------------------|----------------------------|
|      |             | Only IgG-                               | Only IgG+ | Both IgG- and IgG+ |                            |
| 1    | Patient     | 7                                       | 7         | 201                | 0.967                      |
|      | Control     | 23                                      | 7         | 173                | 0.887                      |
| 2    | Patient     | 18                                      | 7         | 190                | 0.916                      |
|      | Control     | 21                                      | 6         | 202                | 0.908                      |
| 3    | Patient     | 107                                     | 4         | 154                | 0.596                      |
|      | Control     | 14                                      | 12        | 145                | 0.918                      |
| 4    | Patient     | 4                                       | 19        | 138                | 0.975                      |
|      | Control     | 29                                      | 6         | 168                | 0.857                      |
| 5    | Patient     | 9                                       | 18        | 162                | 0.952                      |
|      | Control     | 15                                      | 31        | 206                | 0.940                      |

784

785

786 SUPPLEMENTARY TABLE 1. The size of IgG positive and IgG negative fractions  
787 collected during IgG-Seq. This data was used to calculation of IgG probability ratio scores.

| Pair | Participant | Fraction sizes (%) |      |
|------|-------------|--------------------|------|
|      |             | IgG+               | IgG- |
| 1    | Patient     | 21.1               | 79.5 |
|      | Control     | 18.0               | 79.8 |
| 2    | Patient     | 35.1               | 58.1 |
|      | Control     | 48.1               | 49.7 |
| 3    | Patient     | 17.9               | 65.5 |
|      | Control     | 46.3               | 44.9 |
| 4    | Patient     | 65.0               | 29.0 |
|      | Control     | 33.7               | 63.1 |
| 5    | Patient     | 24.2               | 75.3 |
|      | Control     | 62.7               | 31.1 |

788

789

790 FIGURE 1. Stool consistency. (A) Analysis of stool consistency using the Bristol stool form  
791 scale (BSFS) in severe ME/CFS patients (n=5) and matched household controls (n=5). P  
792 values were calculated using a two-tailed paired t-test. (B) Water content in stool samples in  
793 severe ME/CFS patients (n=5) and matched household controls (n=5). P values were  
794 calculated using a two-tailed paired t-test.

795

796 FIGURE 2. Concentration of IgA measured by ELISA in the stool of severe ME/CFS patients  
797 (n=5) and matched household controls (n=5) for (A) microbe bound IgA, and (B) microbe  
798 non-bound IgA. For both plots *p values* were calculated using a two-tailed paired *t*-test.

799

800 FIGURE 3. Profiling stool IgA. (A) Overview of sample preparation for IgA-bound microbe  
801 fluorescent activated cell sorting (FACS) analysis. (B) Representative flow cytometric  
802 analysis of IgA-bound stool microbes. (C) Proportion of stool microbes bound by IgA in  
803 severe ME/CFS patients (n=5) and matched household controls (n=5). P values were  
804 calculated using a two-tailed paired t-test. (D) Analysis of IgA-bound microbial load in  
805 severe ME/CFS patients (n=5) and matched household controls (n=5). P values were  
806 calculated using a two-tailed paired t-test.

807

808 FIGURE 4. Serum IgG reactivity to autologous and heterologous stool microbes. (A)  
809 Overview of assessment of IgG responses to indigenous (autologous) and foreign  
810 (heterologous) stool microbes in severe ME/CFS patients and matched healthy household  
811 controls. (B) Level of IgG in serum of severe ME/CFS patients (n=5) and household control  
812 (n=5) binding to stool microbes from patient and control stool samples in vitro. (C) Levels of

813 IgG in serum of severe ME/CFS patients (n=5) and their matched household controls  
814 quantified by ELISA (n=5). Two-tailed paired t-tests were used to calculate P values.

815

816 FIGURE 5. Quantifying stool microbes recognised by autologous serum IgG. (A) Overview  
817 of sample preparation for IgG-bound microbe FACS analysis. (B) Representative analysis of  
818 serum IgG binding to stool microbes. (C) Analysis of the proportion of stool microbes bound  
819 by serum IgG in severe ME/CFS patients (n=5) and matched household controls (n=5). P  
820 values were calculated using a two-tailed paired t-test.

821

822 FIGURE 6. IgG-Seq. (A) IgG-Seq protocol used to determine taxa from stool samples  
823 reactive to autologous serum IgG. (B) Representative flow cytometric dot plot showing IgG-  
824 Seq gating strategy based upon forward scatter (FSC) and back scatter (BSC) characteristics,  
825 followed by discrimination of singlets from doublets. SYBR+ microbes were discriminated  
826 from auto fluorescent debris and collected for profiling of all stool microbes. IgG positive  
827 and IgG negative populations were sorted from SYBR+ events. (C) Pairwise comparisons of  
828 observed richness of IgG positive and IgG negative microbes in severe ME/CFS patients  
829 (n=5) and matched household controls (n=5). Analyses were performed at the species-level  
830 reads rarefied to the lowest sequencing depth. P values were measured using two-tailed  
831 paired t-tests. (D) Beta diversity of IgG positive species (filled shapes) and IgG negative  
832 species (unfilled shapes) in severe ME/CFS patients (circles) and household controls  
833 (squares). Beta-diversity was calculated using Bray-Curtis dissimilarity, presented on a non-  
834 metric multi-dimensional scaling (NMDS) plot.

835

836 FIGURE 7. Probability of serum IgG binding to autologous stool microbes from severe  
837 ME/CFS patients (n=5) and matched household controls (n=5). IgG probability ratios for  
838 species detected in all participants stool samples.

839

840 SUPPLEMENTARY FIGURE 1. Study participant recruitment pathway. Severe ME patients  
841 were recruited from the CFS clinic at Epsom and St Helier University Hospitals (ESTH),  
842 Carshalton, UK and the ME/CFS service at East Coast Community Healthcare Centre,  
843 Lowestoft, UK.

844

845 SUPPLEMENTARY FIGURE 2. Stool microbial load. Flow cytometric analysis of SYBR  
846 Green+ microbial load in stool samples of severe ME/CFS patients (n=5) and matched  
847 household controls (n=5).

848

849 SUPPLEMENTARY FIGURE 3. Stool microbiome profiling of severe ME/CFS patients  
850 (n=5) and matched household controls (n=5). (A) Relative microbiome profiling (RMP) at  
851 the genus-level. (B) quantitative microbiome profiling (QMP, cells per gram of faeces) at the  
852 genus-level. (C) RMP at the species-level. (D) QMP at the species-level.

853

854 SUPPLEMENTARY FIGURE 4. Pairwise alpha- and beta-diversity comparisons of the stool  
855 microbiomes of severe ME/CFS patients (n=5) and matched household controls (n=5).  
856 Analyses were performed at the species-level on shotgun metagenomics data from SYBR+  
857 stool microbes. (A) Alpha diversity measures of Shannon index, inverse Simpson index and  
858 richness based on reads rarefied to the lowest sequencing depth. P values were measured



859 using two-tailed paired t-tests. (B) Beta diversity of relative microbiome profiling (RMP) and  
860 quantitative microbiome profiling (QMP, cells per gram faeces). Beta-diversity was  
861 calculated using Bray-Curtis dissimilarity, presented on a non-metric multi-dimensional  
862 scaling (NMDS) plot.

863

864 SUPPLEMENTARY FIGURE 5. Functional composition of stool metagenomes from severe  
865 ME/CFS patients (circles) (n=5) and matched household controls (squares) (n=5). Principal  
866 component analysis (PCA) of the relative abundances of gene families. Pair numbers are  
867 depicted on the graph but were not used in analysis.

868

869 SUPPLEMENTARY FIGURE 6. Functional profiling of stool microbes reactive with serum  
870 IgG. Principal component analysis (PCA) of IgG probability ratios of gene families from the  
871 stool microbiome in severe ME/CFS patients (circles) (n=5) and matched household controls  
872 (squares) (n=5). Pair numbers are depicted on the graphs but were not used in analysis.

**A**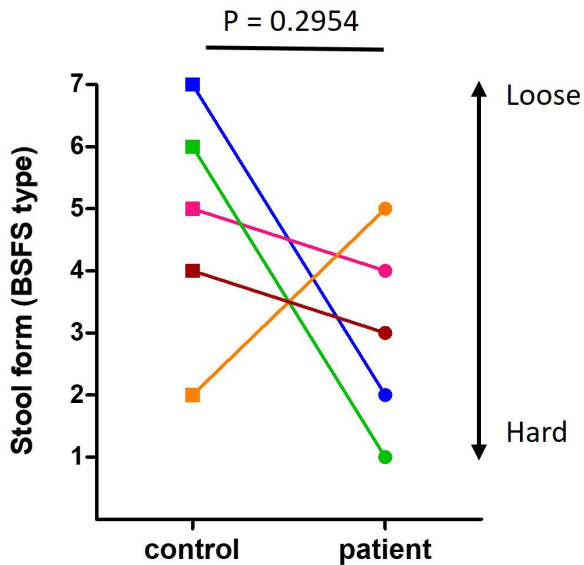**B**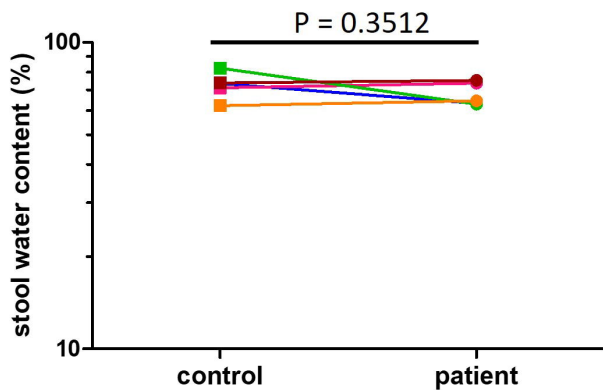**Disease status:**

Patient ●

Control ■

**Pair:**

1 ▲ 2 ▲ 3 ▲ 4 ▲ 5 ▲

**A**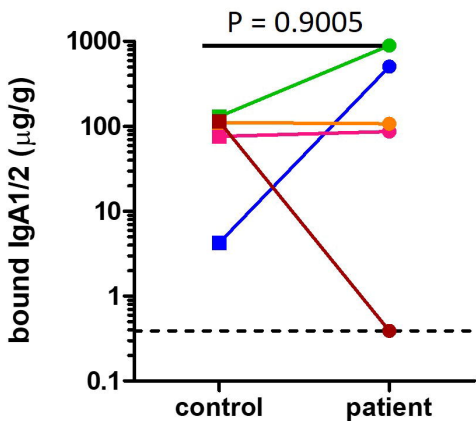**B**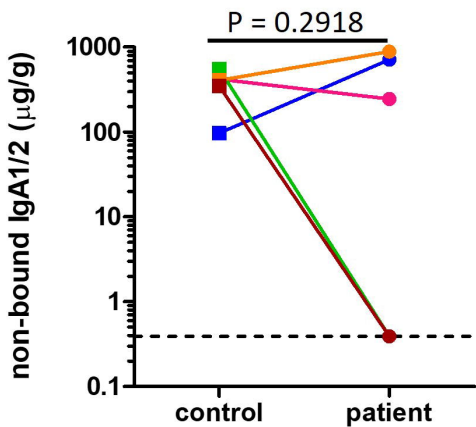**Disease status:**

Patient ●

Control ■

**Pair:**

1 ▲

2 ▲

3 ▲

4 ▲

5 ▲

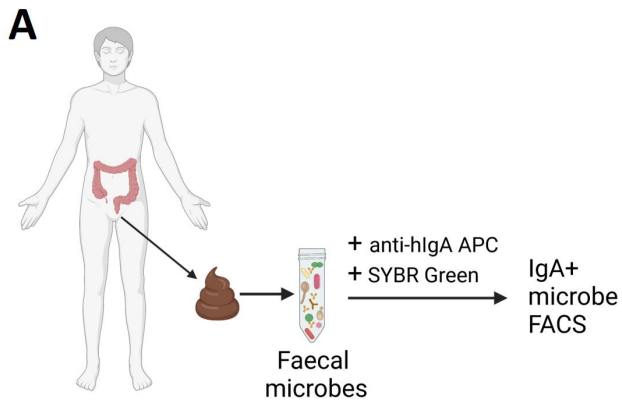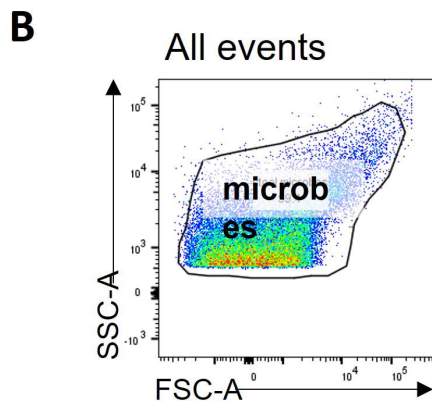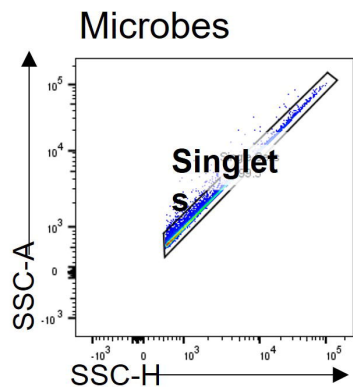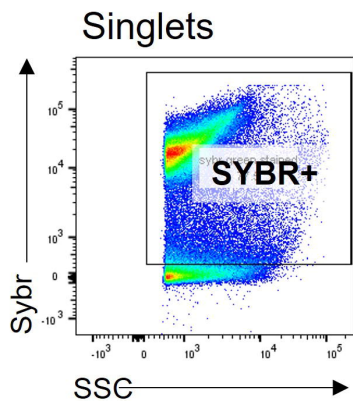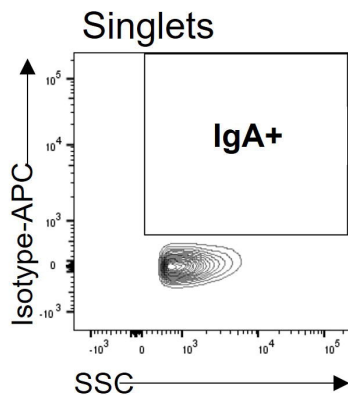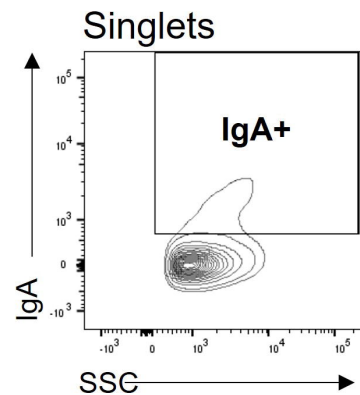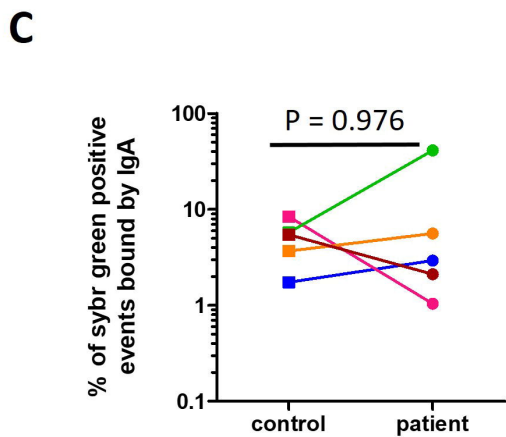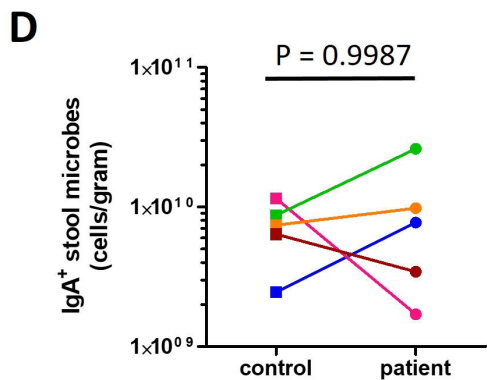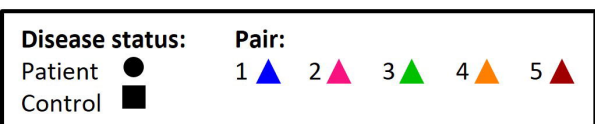

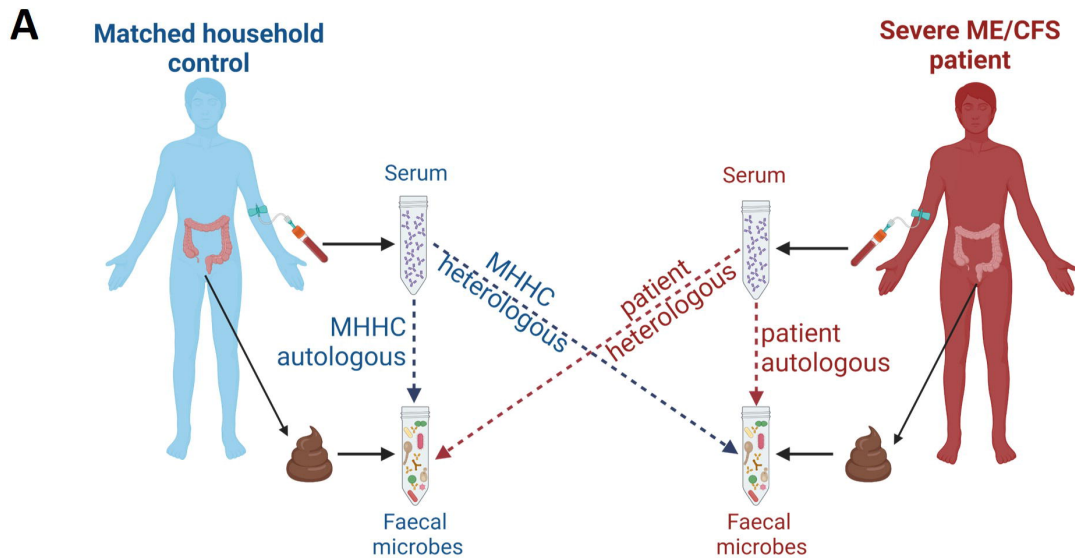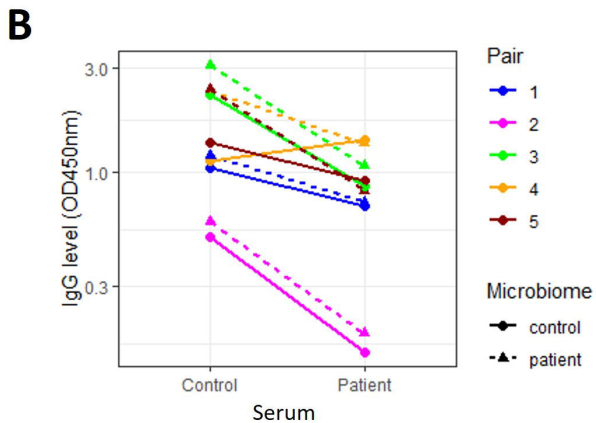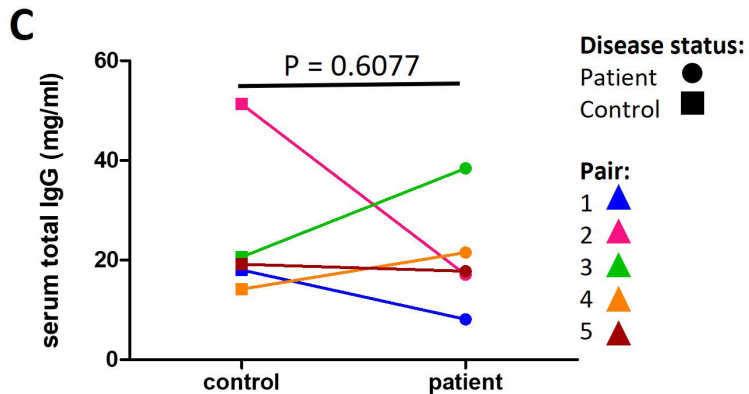

**A**

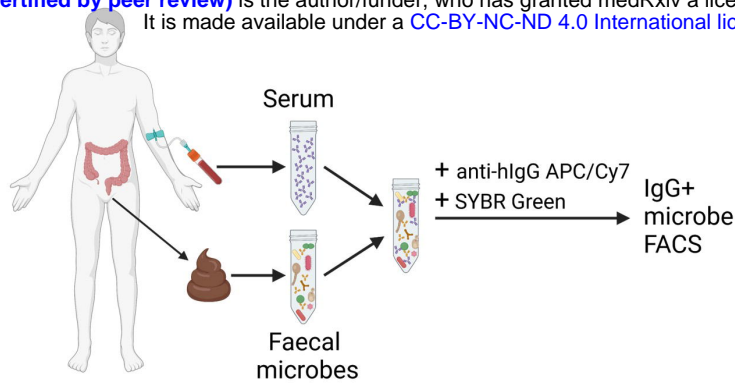

**B**

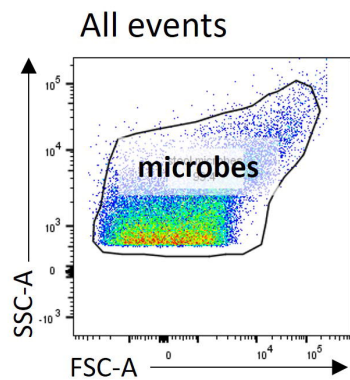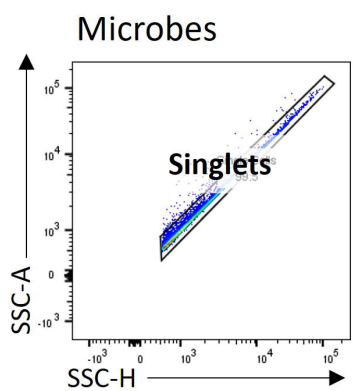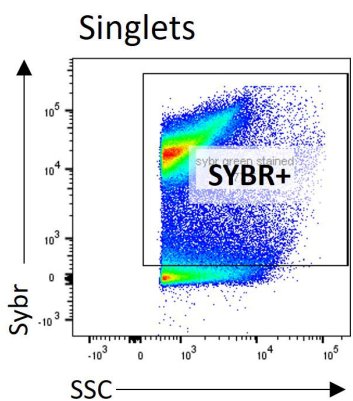

**C**

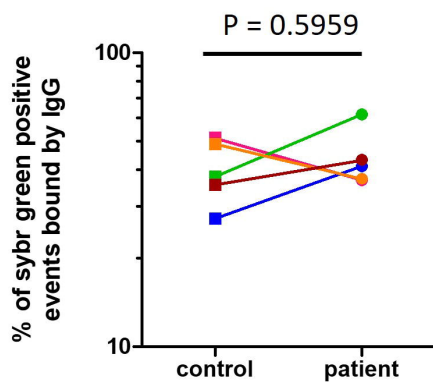

Disease status:

Patient ●  
Control ■

Pair:

1 ▲ 2 ▲ 3 ▲ 4 ▲ 5 ▲

Singlets

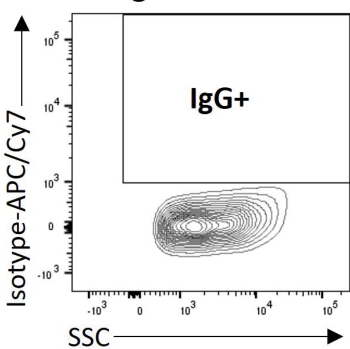

Singlets

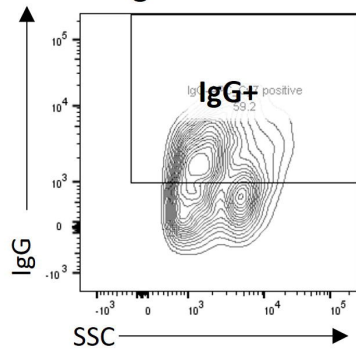



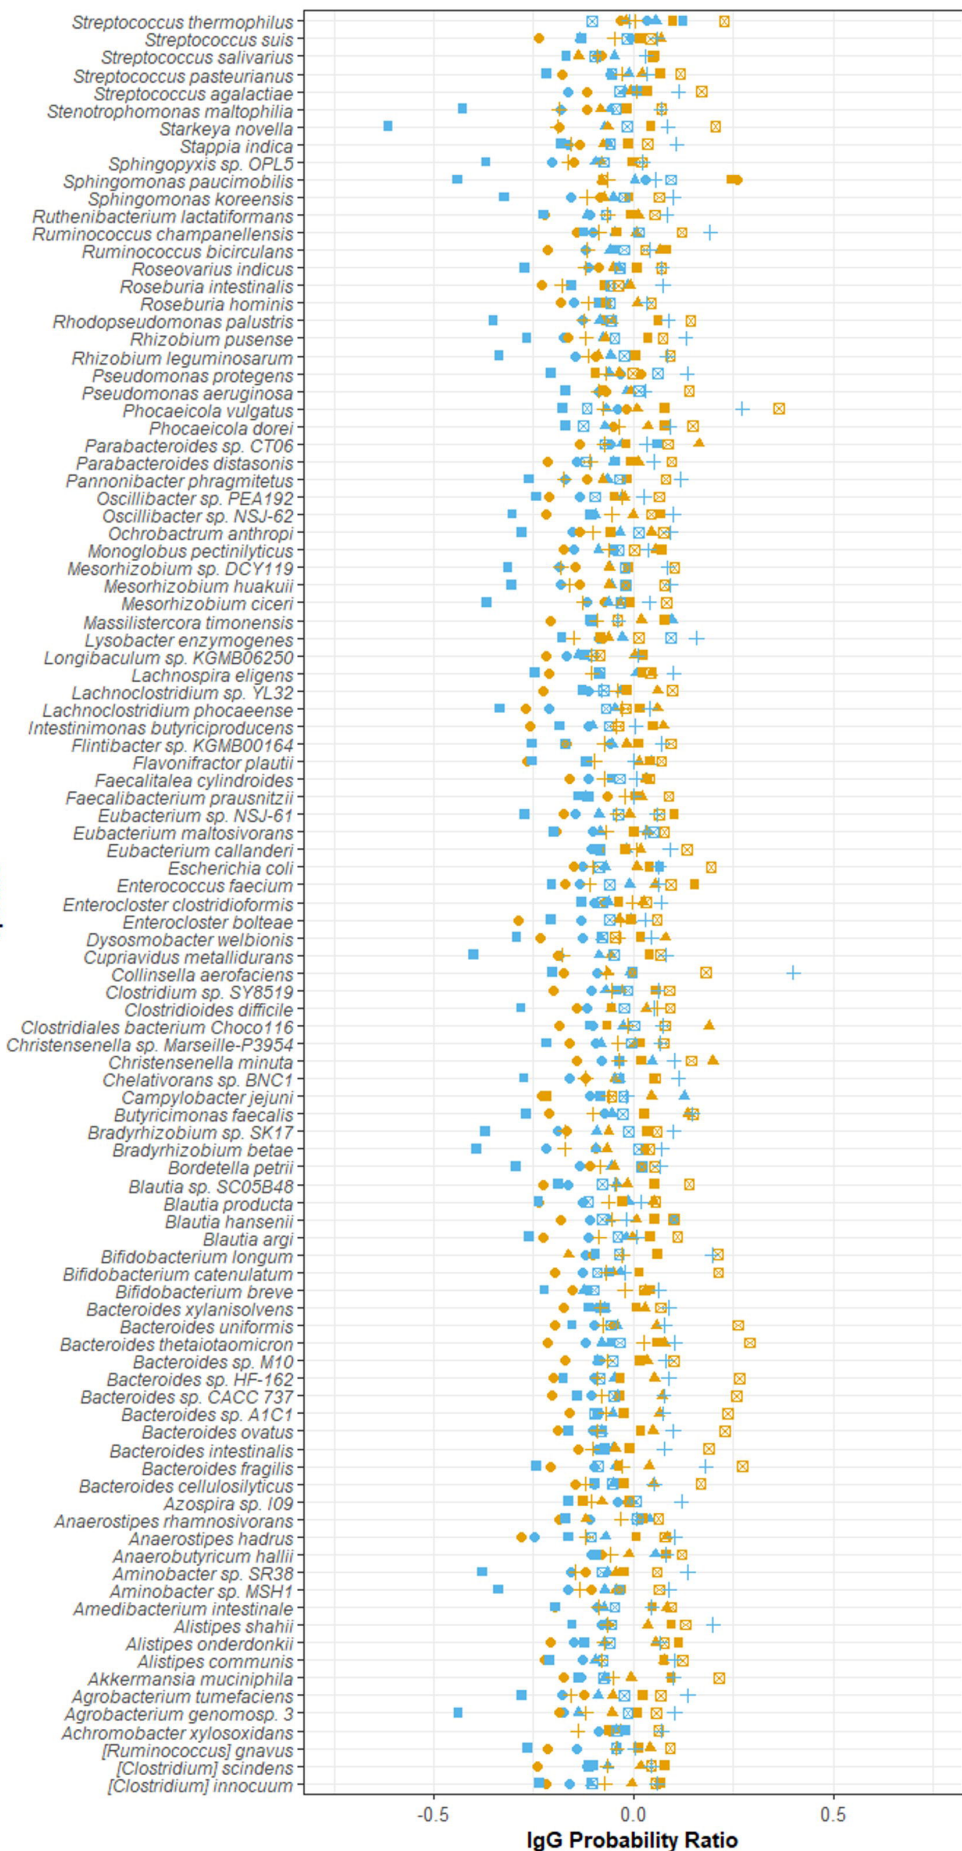

Source: https://medrxiv.org/content/10.1101/2023.05.21.23290299v1.full.pdf
